# Supplementary material for: Antarctic Krill 454 Pyrosequencing Reveals Chaperone and Stress Transcriptome
Source: PubMed Central journal article supplement (PMC3017093; doi:10.1371/journal.pone.0015919), 2011-01-06

contig02253 MA--KAPAVGDLGTTYSCVGFQHGKVEIANDQGNRTTPSYVAFDTSERLIGDSAANKQVAMNPNTVFDKRLIGRKF 78  
contig06573 -----AAKNQVAMNPSNTVFDKRLIGRKY 25  
Balanus amphitrite MA--KAPAVGDLGTTYSCVGFQHGKVEIANDQGNRTTPSYVAFDTSERLIGDSAANKQVAMNPSNTVFDKRLIGRKY 78  
Artemia sanfranciscana MA--KAPAVGDLGTTYSCVGFQHGKVEIANDQGNRTTPSYVAFDTSERLIGDSAANKQVAMNPSNTVFDKRLIGRKY 78  
Moina macropoda MA--KAPAVGDLGTTYSCVGFQHGKVEIANDQGNRTTPSYVAFDTSERLIGDSAANKQVAMNPSNTVFDKRLIGRKY 79  
Daphnia magna MA--KAPAVGDLGTTYSCVGFQHGKVEIANDQGNRTTPSYVAFDTSERLIGDSAANKQVAMNPSNTVFDKRLIGRKY 79  
Tigriopus japonicus MA--KAA-VGLGTTYSCVGFQHGKVEIANDQGNRTTPSYVAFDTSERLIGDSAANKQVAMNPSNTVFDKRLIGRKY 76  
Pachygrapsus marmoratus MS--KGAAVGDLGTTYSCVGFQHGKVEIANDQGNRTTPSYVAFDTSERLIGDSAANKQVAMNPSNTVFDKRLIGRKY 78  
Homarus americanus MA--KTTAVGDLGTTYSCVGFQHGKVEIANDQGNRTTPSYVAFDTSERLIGDSAANKQVAMNPSNTVFDKRLIGRKY 78  
Penaeus monodon MA--KAPAVGDLGTTYSCVGFQHGKVEIANDQGNRTTPSYVAFDTSERLIGDSAANKQVAMNPSNTVFDKRLIGRKY 78  
Metapenaeus ensis MS--KASAVGDLGTTYSCVGFQHGKVEIANDQGNRTTPSYVAFDTSERLIGDSAANKQVAMNPSNTVFDKRLIGRKY 78  
Litopenaeus vannamei MA--KAPAVGDLGTTYSCVGFQHGKVEIANDQGNRTTPSYVAFDTSERLIGDSAANKQVAMNPSNTVFDKRLIGRKY 78  
Rimicaris exoculata-3 MA--KTTAVGDLGTTYSCVGFQHGKVEIANDQGNRTTPSYVAFDTSERLIGDSAANKQVAMNPSNTVFDKRLIGRKY 78  
Rimicaris exoculata-2 -----YVAFDTSERLIGDSAANKQAAINPANTVFDKRLIGRKY 38  
Rimicaris exoculata-1 -----AFDTSERLIGDSAANKQAAAMPANTVFDKRLIGRKY 36  
Palaeomonetes varians -----YVAFDTSERLIGDSAANKQVAMNPSNTVFDKRLIGRKY 38  
Mirocaris fortunata MA--KTTAVGDLGTTYSCVGFQHGKVEIANDQGNRTTPSYVAFDTSERLIGDSAANKQVAMNPSNTVFDKRLIGRKY 78  
Macrobrachium rosenbergii MA--KSAAVGDLGTTYSCVGFQHGKVEIANDQGNRTTPSYVAFDTSERLIGDSAANKQVAMNPSNTVFDKRLIGRKY 78  
Portunus trituberculatus MA--KAAVAVGDLGTTYSCVGFQHGKVEIANDQGNRTTPSYVAFDTSERLIGDSAANKQVAMNPSNTVFDKRLIGRKY 78  
Portunus sanguinolentus MS--KGAAVGDLGTTYSCVGFQHGKVEIANDQGNRTTPSYVAFDTSERLIGDSAANKQVAMNPSNTVFDKRLIGRKY 78  
Eriocheir sinensis MS--RGAAVGDLGTTYSCVGFQHGKVEIANDQGNRTTPSYVAFDTSERLIGDSAANKQVAMNPSNTVFDKRLIGRKY 78  
Calinectes sapidus MS--KGAAVGDLGTTYSCVGFQHGKVEIANDQGNRTTPSYVAFDTSERLIGDSAANKQVAMNPSNTVFDKRLIGRKY 78  
Scylla paramamosain MS--KGAAVGDLGTTYSCVGFQHGKVEIANDQGNRTTPSYVAFDTSERLIGDSAANKQVAMNPSNTVFDKRLIGRKY 78

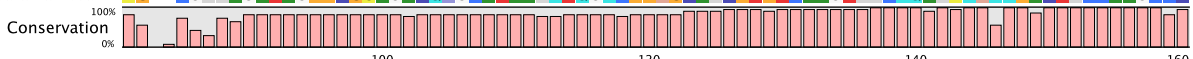

contig02253 DDPVYQADMKHWPFNVVSDGGKPKLVEYFKGETKSFPEEISSMVLNKMRETAEAYLGATVKDAVITVPAYFNDSSQRQAT 158  
contig06573 DDATVQADKKHWPQVNTNNGKPKQVVEFKGETKSFPEEISSMVLNKMRETAEAYLGATVKDAVITVPAYFNDSSQRQAT 105  
Balanus amphitrite DDTAVQSDMKHWPFKVSDGGKPKLVEYFKGETKSFPEEISSMVLNKMRETAEAYLGATVKDAVITVPAYFNDSSQRQAT 158  
Artemia sanfranciscana EDATVQSDMKHWPFDVSDGGKPKLVEYFKGETKSFPEEISSMVLNKMRETAEAYLGATVKDAVITVPAYFNDSSQRQAT 158  
Moina macropoda DDATVQSDMKHWPFKVSDGGKPKLVEYFKGETKSFPEEISSMVLNKMRETAEAYLGATVKDAVITVPAYFNDSSQRQAT 159  
Daphnia magna DDATVQSDMKHWPFKVSDGGKPKLVEYFKGETKSFPEEISSMVLNKMRETAEAYLGATVKDAVITVPAYFNDSSQRQAT 159  
Tigriopus japonicus NDTTQQRDMKHWPFVSDGGKPKLVEYFKGETKSFPEEISSMVLNKMRETAEAYLGATVKDAVITVPAYFNDSSQRQAT 156  
Pachygrapsus marmoratus NDHNVQSDMKHWPFDVSDGGKPKLVEYFKGETKSFPEEISSMVLNKMRETAEAYLGATVKDAVITVPAYFNDSSQRQAT 158  
Homarus americanus DDHNVQSDMKHWPFDVSDGGKPKLVEYFKGETKSFPEEISSMVLNKMRETAEAYLGATVKDAVITVPAYFNDSSQRQAT 158  
Penaeus monodon EDHTVQSDMKHWPFTIINESTKPKLVEYFKGETKSFPEEISSMVLNKMRETAEAYLGATVKDAVITVPAYFNDSSQRQAT 158  
Metapenaeus ensis DDATVQSDMKHWPFTIINESTKPKLVEYFKGETKSFPEEISSMVLNKMRETAEAYLGATVKDAVITVPAYFNDSSQRQAT 158  
Litopenaeus vannamei EDHTVQSDMKHWPFTIINESTKPKLVEYFKGETKSFPEEISSMVLNKMRETAEAYLGATVKDAVITVPAYFNDSSQRQAT 158  
Rimicaris exoculata-3 DEGVQADMKHWPFDDVSDGGKPKLVEYFKGETKSFPEEISSMVLNKMRETAEAYLGATVKDAVITVPAYFNDSSQRQAT 158  
Rimicaris exoculata-2 DDPTVQADMKHWPFKVVSDGGKPKLVEYFKGETKSFPEEISSMVLNKMRETAEAYLGATVKDAVITVPAYFNDSSQRQAT 118  
Rimicaris exoculata-1 DDPTVQSDMKHWPQVSSDGGKPKLVEYFKGETKSFPEEISSMVLNKMRETAEAYLGATVKDAVITVPAYFNDSSQRQAT 116  
Palaeomonetes varians DDATVQSDMKHWPFTIINESTKPKLVEYFKGETKSFPEEISSMVLNKMRETAEAYLGATVKDAVITVPAYFNDSSQRQAT 118  
Mirocaris fortunata DEGVQADMKHWPFDDVSDGGKPKLVEYFKGETKSFPEEISSMVLNKMRETAEAYLGATVKDAVITVPAYFNDSSQRQAT 158  
Macrobrachium rosenbergii DDGVQSDMKHWPFTIINESTKPKLVEYFKGETKSFPEEISSMVLNKMRETAEAYLGATVKDAVITVPAYFNDSSQRQAT 158  
Portunus trituberculatus EDATVQSDMKHWPFTVSDGGKPKLVEYFKGETKSFPEEISSMVLNKMRETAEAYLGATVKDAVITVPAYFNDSSQRQAT 158  
Portunus sanguinolentus TDSVQADMKHWPFKVVSDGGKPKLVEYFKGETKSFPEEISSMVLNKMRETAEAYLGATVKDAVITVPAYFNDSSQRQAT 158  
Eriocheir sinensis NDHNVQSDMKHWPFDVSDGGKPKLVEYFKGETKSFPEEISSMVLNKMRETAEAYLGATVKDAVITVPAYFNDSSQRQAT 158  
Calinectes sapidus TDHNVQSDMKHWPFDVSDGGKPKLVEYFKGETKSFPEEISSMVLNKMRETAEAYLGATVKDAVITVPAYFNDSSQRQAT 158  
Scylla paramamosain NDHNVQSDMKHWPFDVSDGGKPKLVEYFKGETKSFPEEISSMVLNKMRETAEAYLGATVKDAVITVPAYFNDSSQRQAT 158

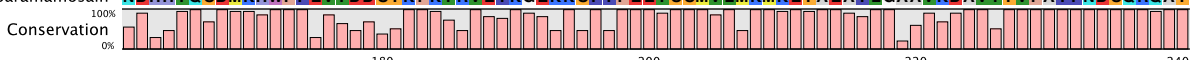

contig02253 KDAGTISGLNVLRIINEPTAAAAYGLDKK---VGGERNVLI FDLGGGTFDVSILNIEDGIFEVKSTAGDTHGGEDFD 234  
contig06573 KDAGVLAGLNVLRIINEPTAAAAYGLDKKTGST----- 139  
Balanus amphitrite KDAGAISGLNVLRIINEPTAAAAYGLDKK---VGGERNVLI FDLGGGTFDVSILNIEDGIFEVKSTAGDTHGGEDFD 234  
Artemia sanfranciscana KDAGAISGLNVLRIINEPTAAAAYGLDKK---TVGKKNVLI FDLGGGTFDVSILNIEDGIFEVKSTAGDTHGGEDFD 234  
Moina macropoda KDAGTISGLNVLRIINEPTAAAAYGLDKK---VGGERNVLI FDLGGGTFDVSILNIEDGIFEVKSTAGDTHGGEDFD 235  
Daphnia magna KDAGTISGLNVLRIINEPTAAAAYGLDKK---VTGERHVL FDLGGGTFDVSILNIEDGIFEVKSTAGDTHGGEDFD 235  
Tigriopus japonicus KDAGTISGMNVLRIINEPTAAAAYGLDKK---SGKESNVL FDLGGGTFDVSILNIEDGIFEVKSTAGDTHGGEDFD 234  
Pachygrapsus marmoratus KDAGTISGLNVLRIINEPTAAAAYGLDKK---VGGERNVLI FDLGGGTFDVSILNIEDGIFEVKSTAGDTHGGEDFD 234  
Homarus americanus KDAGTISGLNVLRIINEPTAAAAYGLDKK---VGGERNVLI FDLGGGTFDVSILNIEDGIFEVKSTAGDTHGGEDFD 234  
Penaeus monodon KDAGTISGLNVLRIINEPTAAAAYGLDKK---VGGERNVLI FDLGGGTFDVSILNIEDGIFEVKSTAGDTHGGEDFD 234  
Metapenaeus ensis KDAGTISGLNVLRIINEPTAAAAYGLDKK---VGGERNVLI FDLGGGTFDVSILNIEDGIFEVKSTAGDTHGGEDFD 234  
Litopenaeus vannamei KDAGTISGLNVLRIINEPTAAAAYGLDKK---VGGERNVLI FDLGGGTFDVSILNIEDGIFEVKSTAGDTHGGEDFD 234  
Rimicaris exoculata-3 KDAGTISGLNVLRIINEPTAAAAYGLDKK---VGGERNVLI FDLGGGTFDVSILNIEDGIFEVKSTAGDTHGGEDFD 234  
Rimicaris exoculata-2 KDAGVLAGLNVLRIINEPTAAAAYGLDKKAGSGTGERNVLI FDLGGGTFDVSILNIEDGIFEVKSTAGDTHGGEDFD 198  
Rimicaris exoculata-1 KDAGVLAGLNVLRIINEPTAAAAYGLDKKAGSGSAGSERNVLI FDLGGGTFDVSILNIEDGIFEVKSTAGDTHGGEDFD 196  
Palaeomonetes varians KDAGTISGLNVLRIINEPTAAAAYGLDKK---VGGERNVLI FDLGGGTFDVSILNIEDGIFEVKSTAGDTHGGEDFD 194  
Mirocaris fortunata KDAGTISGLNVLRIINEPTAAAAYGLDKK---VGGERNVLI FDLGGGTFDVSILNIEDGIFEVKSTAGDTHGGEDFD 234  
Macrobrachium rosenbergii KDAGTISGLNVLRIINEPTAAAAYGLDKK---VGGERNVLI FDLGGGTFDVSILNIEDGIFEVKSTAGDTHGGEDFD 234  
Portunus trituberculatus KDAGTISGMNVLRIINEPTAAAAYGLDKR---VGGERNVLI FDLGGGTFDVSILNIEDGIFEVKSTAGDTHGGEDFD 234  
Portunus sanguinolentus KDAGVISGLNVLRIINEPTAAAAYGLDKG---KRGERNVLI FDLGGGTFDVSILNIEDGIFEVKSTAGDTHGGEDFD 234  
Eriocheir sinensis KDAGTISGLNVLRIINEPTAAAAYGLDKK---VGGERNVLI FDLGGGTFDVSILNIEDGIFEVKSTAGDTHGGEDFD 234  
Calinectes sapidus KDAGTISGVNVLRIINEPTAAAAYGLDKK---VGGERNVLI FDLGGGTFDVSILNIEDGIFEVKSTAGDTHGGEDFD 234  
Scylla paramamosain KDAGTISGVNVLRIINEPTAAAAYGLDKK---VGGERNVLI FDLGGGTFDVSILNIEDGIFEVKSTAGDTHGGEDFD 234

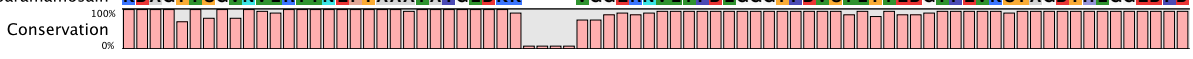

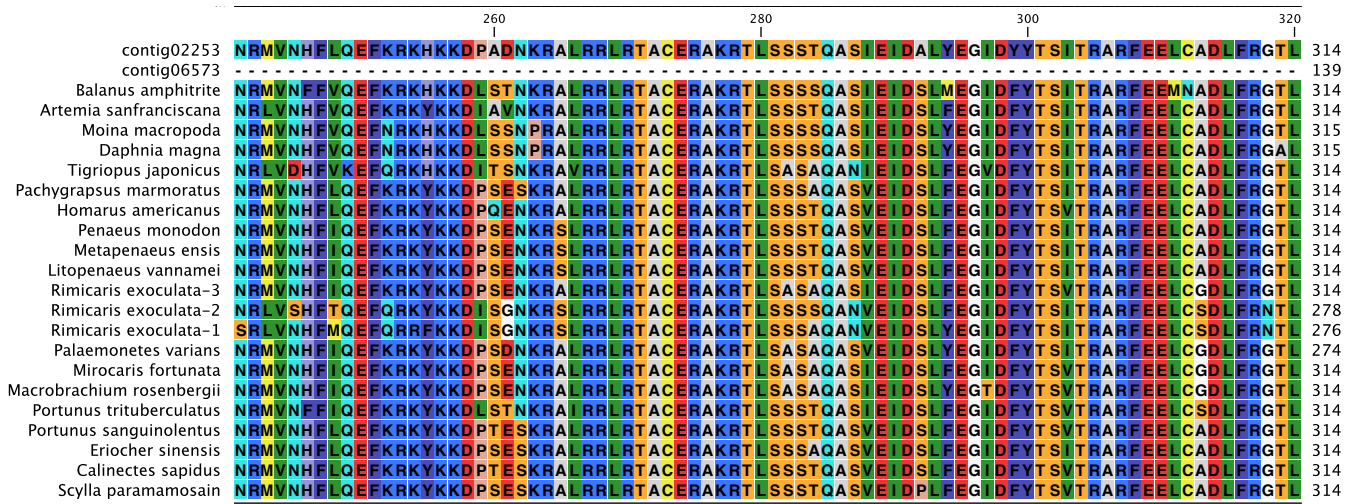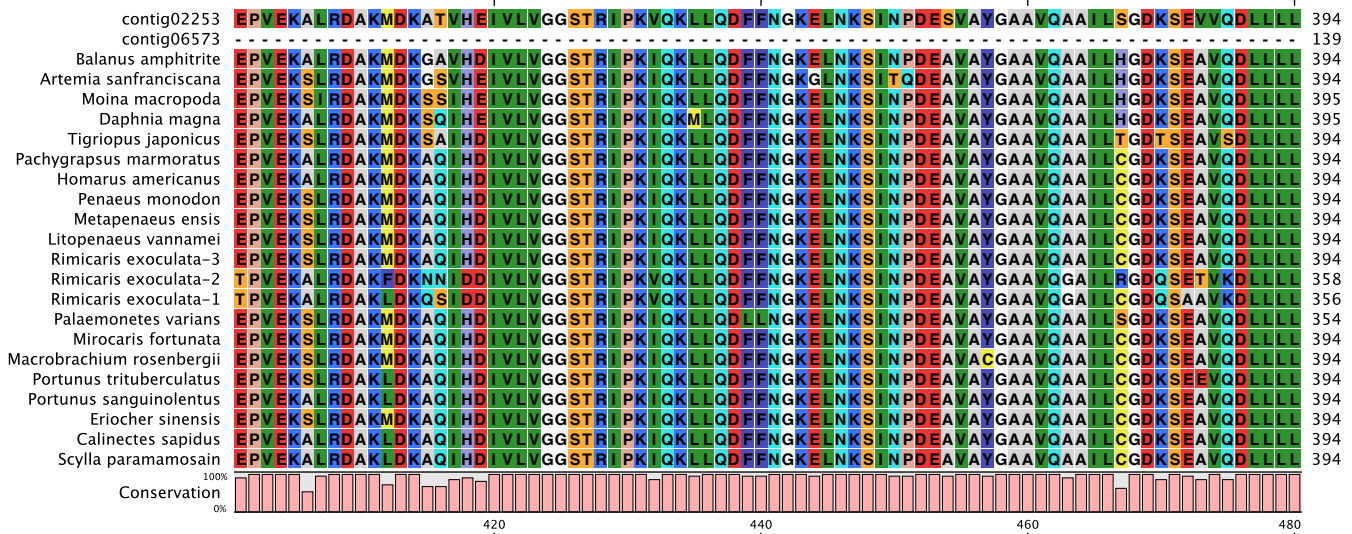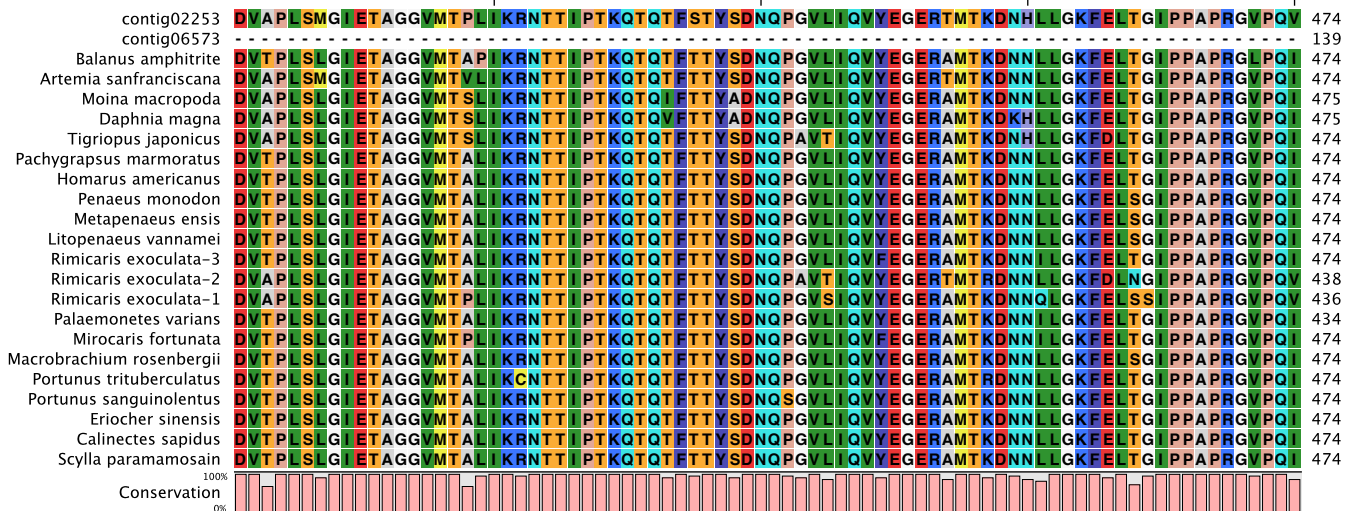

Supplement: pone.0015919.s002.pdf [file pone.0015919.s002.pdf]
