# Supplementary material for: Antarctic Krill 454 Pyrosequencing Reveals Chaperone and Stress Transcriptome
Source: PubMed Central journal article supplement (PMC3017093; doi:10.1371/journal.pone.0015919), 2011-01-06

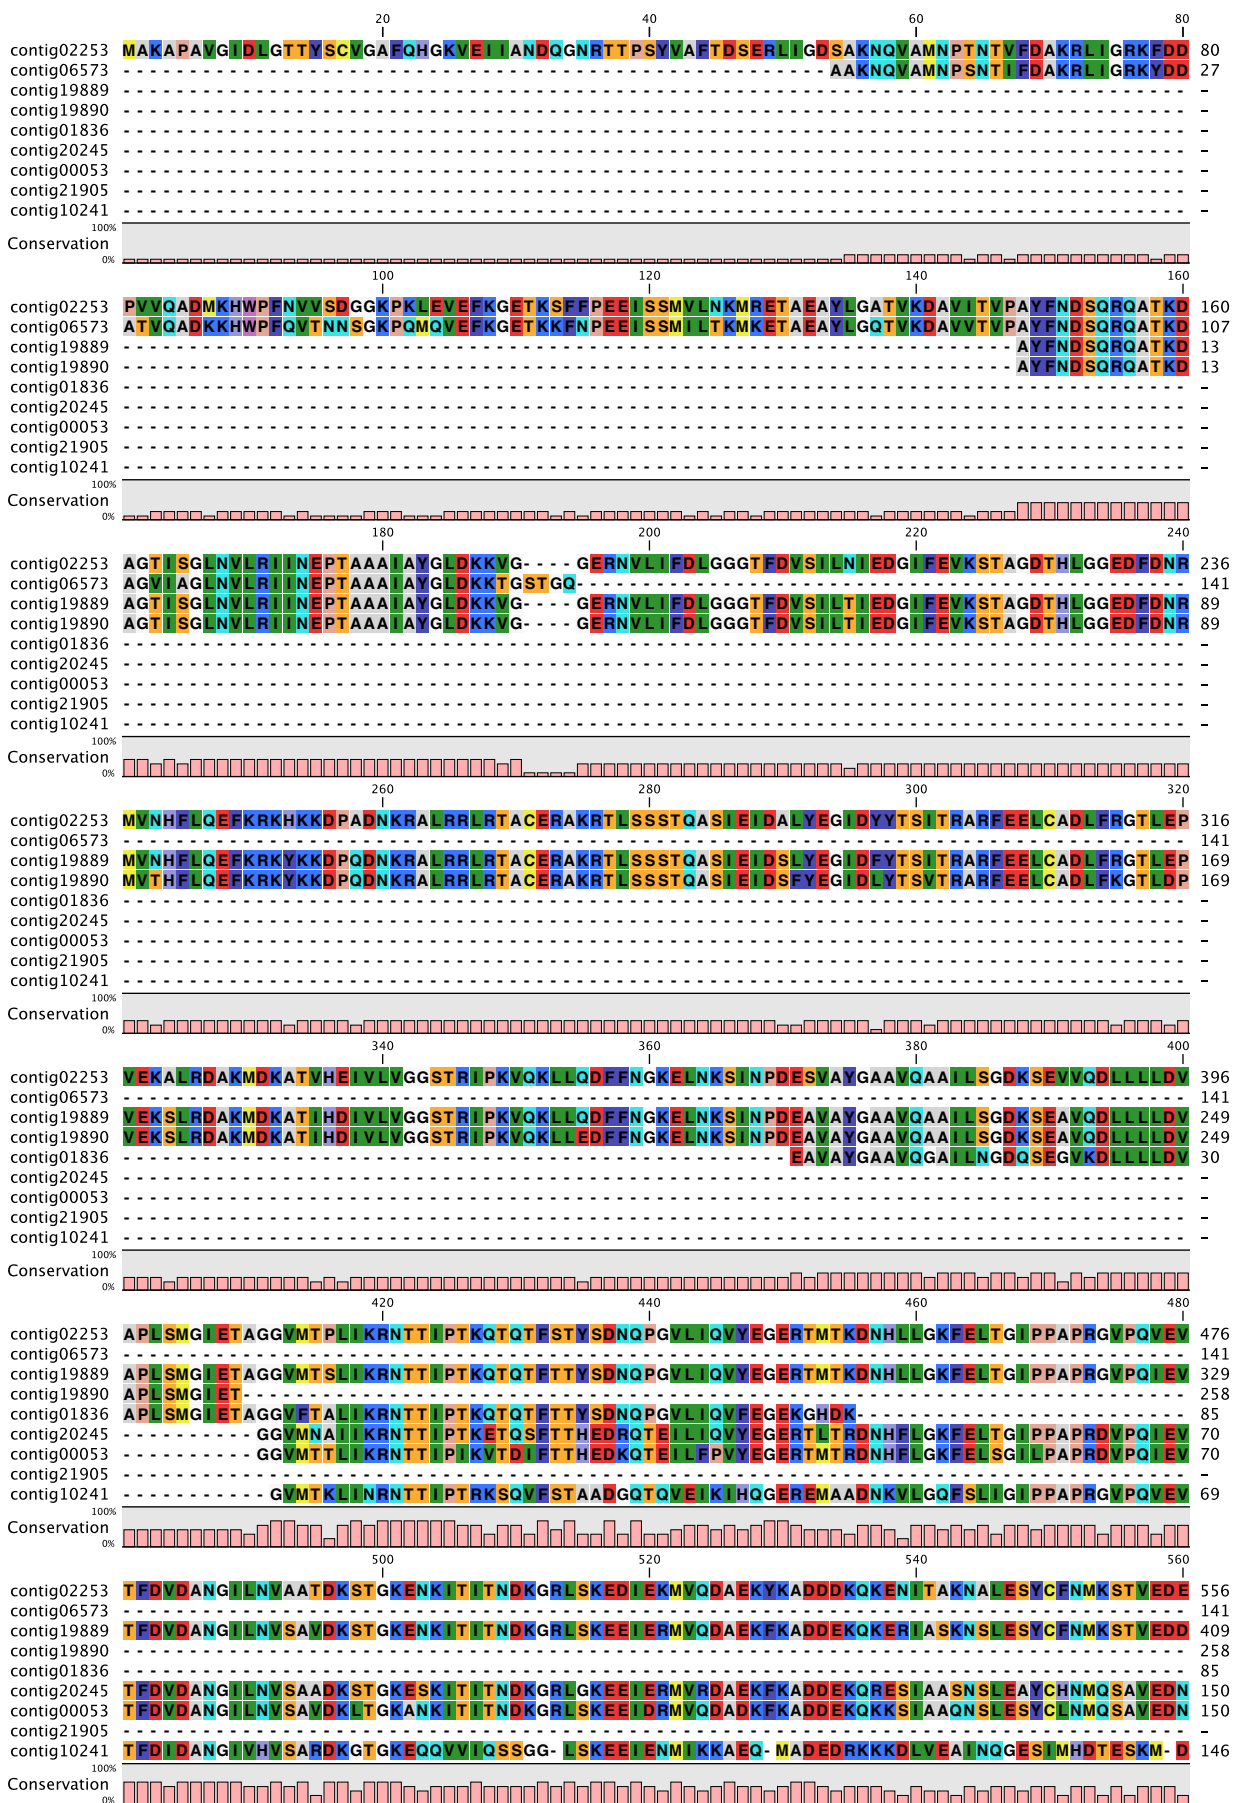

580 600 620 640

contig02253 **KFKDKVPEEDRTKILEACNEAIKWL**DANQ**GEKDEYEHKQKELEQLCNPIITKMYQAAGGAPGGMP**EGMGGMPGGMGGMP 636

contig06573 ..... 141

contig19889 **KFKDKVPEEDRTKIMEACNEAIKWL**DANQ**GEKEEYEHKQKELEQLCNPIITKMYQAAGGAPGGMP**SG- 477

contig19890 ..... 258

contig01836 ..... 85

contig20245 **K--KVP**AEDRN**KIMD**ACNEAIKWL**DNMQ**..... 176

contig00053 **K--KVP**AGDR**SKIMD**ACNEAIKWL**DAMQLEDKEEF**EHKQKE**LEQLCNPIITKMYQAAG**..... 206

contig21905 ..... **LEDKEEF**EHKQKE**LEQLCNPIITKMYQATG**..... 30

contig10241 **EYKDQLPEEETT**KIK**EQITKVKDL**LAN**KDSVDPETIKKEVSD**L**QQSS**L**KL**F**EMAYKKMAAER**- 208

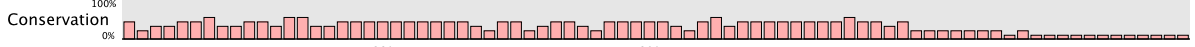

660 680

contig02253 **GGMGGMPGGFPGADASAPG**-----**TGGSAGPTIEEVD**----- 668

contig06573 ..... 141

contig19889 ..... **FPGSD**AGAP**GAGAPPGAGSSGS**- **GPTIEEVD**----- 507

contig19890 ..... 258

contig01836 ..... 85

contig20245 ..... 176

contig00053 ..... 206

contig21905 ..... 30

contig10241 ..... 208

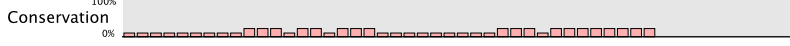

Supplement: pone.0015919.s001.pdf [file pone.0015919.s001.pdf]
