# Supplementary material for: Antarctic Krill 454 Pyrosequencing Reveals Chaperone and Stress Transcriptome
Source: PubMed Central journal article supplement (PMC3017093; doi:10.1371/journal.pone.0015919), 2011-01-06
Supplement: pone.0015919.s003.pdf [file pone.0015919.s003.pdf]

contig00022 M E G E V E T F A F Q A E I A Q L M S I I N T F Y S N K E I F L R E L I S N S S D A D K I R Y E S L T D P T K L E A Q K E L F I K L I P D K N E G T L T I 80  
 contig10288 -----  
 contig00026 -----  
 contig02405 -----  
 contig02406 -----  
 contig00025 -----

contig00022 D S G V G M T K A D L I N N L G T I A K S G T K A F M E A S A G A D S M I G Q F G V G F Y S A Y L V L A D K V V V T S K C N D D E Q V Y W E S S A G G S F T 160  
 contig10288 -----  
 contig00026 -----  
 contig02405 -----  
 contig02406 -----  
 contig00025 -----

contig00022 R T D N S E P I G R G T K I V L H L K E D M T D Y C E E K T V K E I V K K H S Q F I G Y P I K L L V E K E R D L E I S D E E E E E D K E K M Q I R R K R M R I N 240  
 contig10288 -----  
 contig00026 -----  
 contig02405 -----  
 contig02406 -----  
 contig00025 -----

contig00022 Q K L K M L V R M K M Q I R M L I K T K R R K K T V K E K Y T E D E E L N K T K P L W T R N P D D V S T E E Y G F E R Y K S I T N D W E D H L A V K H F S V E G Q I 320  
 contig10288 -----  
 contig00026 -----  
 contig02405 -----  
 contig02406 -----  
 contig00025 -----

contig00022 E F R A L L F I P R R A A F D I F E N K K Q K N K I K L Y V R R V F I M E N C E D L I P D Y I N F I T G V Y D S E D I P N I S R E M L Q Q N K I L K V I R K N 400  
 contig10288 -----  
 contig00026 -----  
 contig02405 -----  
 contig02406 -----  
 contig00025 -----

contig00022 L V K K A M E L I E E C E D K E N Y T K F Y E N F S K N K L G I H E D S N N R K K L A D F L R Y H T S S S G D E M T S L K D Y V S R M K E T Q K Q I Y Y I T 480  
 contig10288 -----  
 contig00026 -----  
 contig02405 -----  
 contig02406 -----  
 contig00025 -----

contig00022 G E S K D Q V A N S A F V E R V K K R G F E V I Y M T E P I D E Y C V Q Q L K E Y D G K T I Y S I T K E G L E I P E D E E E K K K F E E Q K T K M E N L C K V M 560  
 contig10288 G E G R E Q V T N S S F V E R V K K G G F E V I Y M T D P I D E Y S I T Q L K E Y E G K Q L I S V T K E G L E I P E D D D Q ----- 128  
 contig00026 ----- ----- M E N L C K V M 8  
 contig02405 -----  
 contig02406 -----  
 contig00025 -----

contig00022 K D I L D K R V E K V L V S N R L E T S P C C I V T S Q H G W T A N M E R I M K A Q A L R D T S T M G Y M A A K K H L E I N P D H S I I E ----- 629  
 contig10288 ----- ----- 128  
 contig00026 K D I L D K R V E K V V S N R L V T S P C C I V T S Q Y G W T A N M E R I M K A Q A L R D T S T M G Y M A A K K H L E I N P D H S I V E ----- 77  
 contig02405 ----- ----- H S I V E T L R Q K A D A D K N 16  
 contig02406 ----- ----- H S I V E T L R Q K A D A D K N 16  
 contig00025 ----- ----- R K K A D A D K N 9

contig00022 ----- 629  
 contig10288 ----- 128  
 contig00026 ----- 77  
 contig02405 D K S V K D I V M L L F E T S L S S G F S L E D P G I H A S R I Y R M I R L G L G I D E E D L P V E D S N T A E E M P P I E G D D E D A S R M E E V D \* 93  
 contig02406 D K S V K D I V M L L F E T S L S S G F S L E D P G I H A S R I Y R M I R L G L G I D E E D L P V E D S N T A E E M P P I E G D D E D A S R M E E V D \* 93  
 contig00025 D K S V K D I V M L L F E T S L L T S G F S L E D P G V H S S R I Y R M I K L G L G I D E E E A P V K D S N V E E E M P S I E G D D E D A S R ----- 80
