# Supplementary material for: Antarctic Krill 454 Pyrosequencing Reveals Chaperone and Stress Transcriptome
Source: PubMed Central journal article supplement (PMC3017093; doi:10.1371/journal.pone.0015919), 2011-01-06

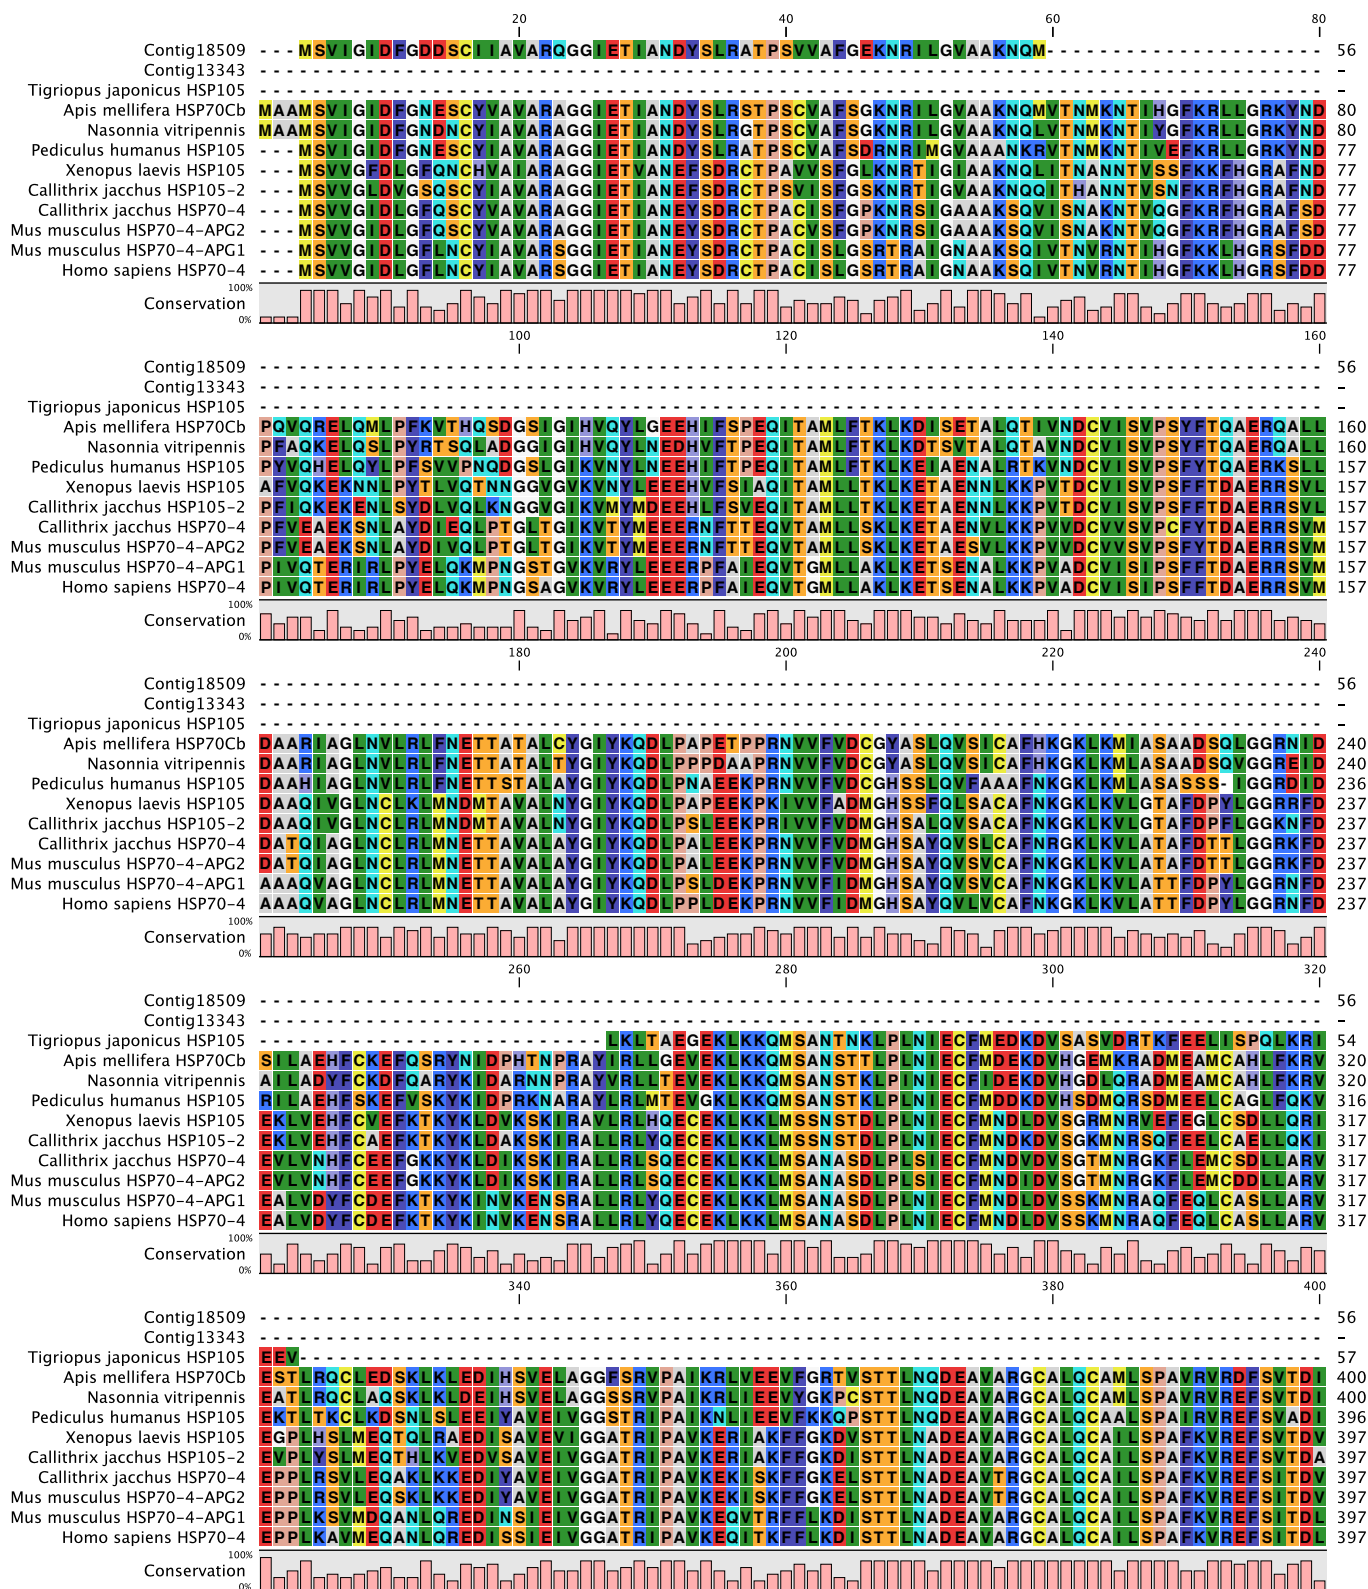

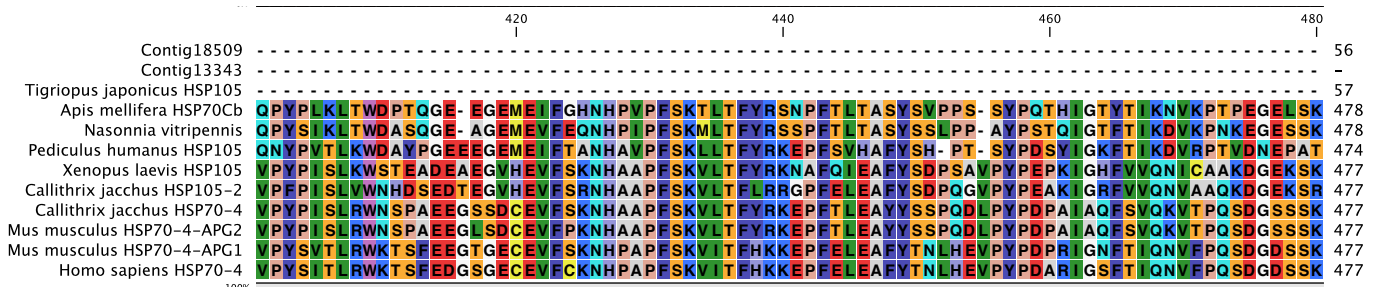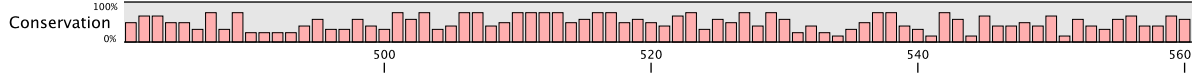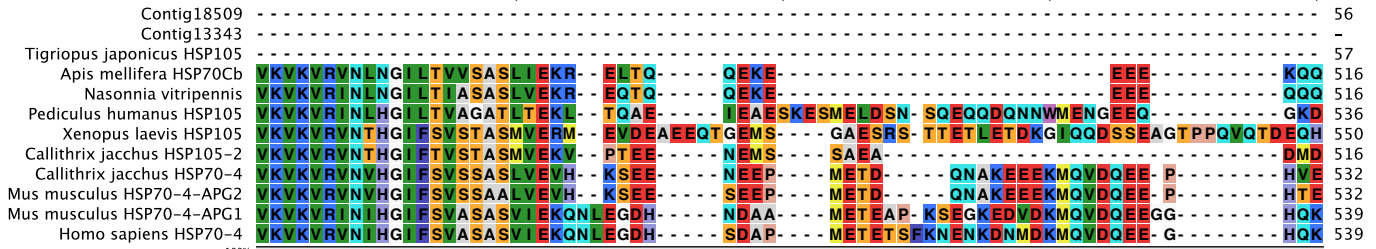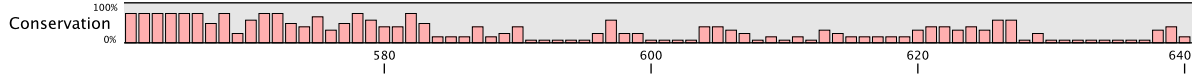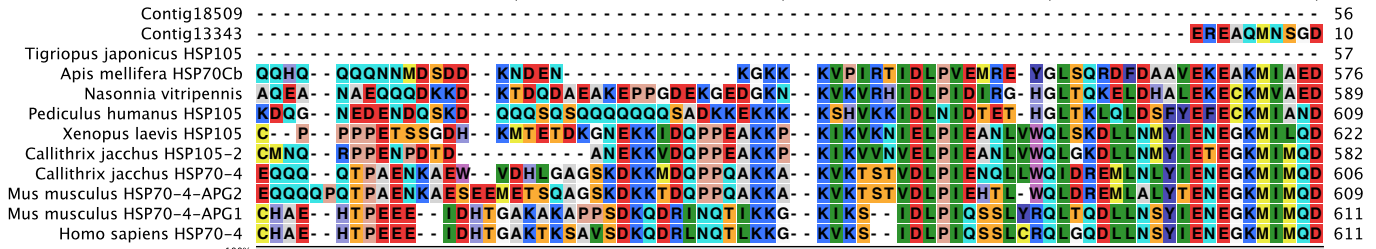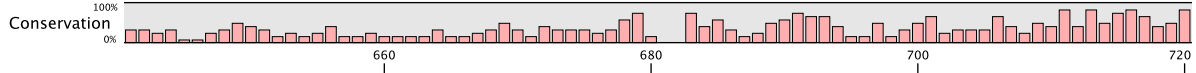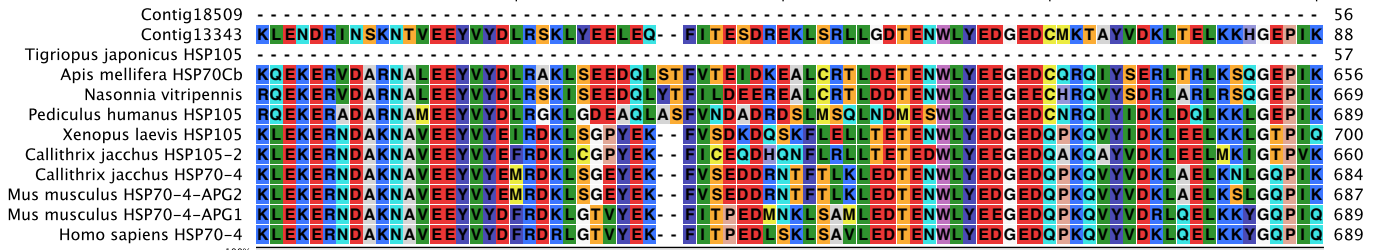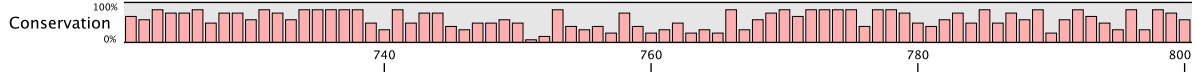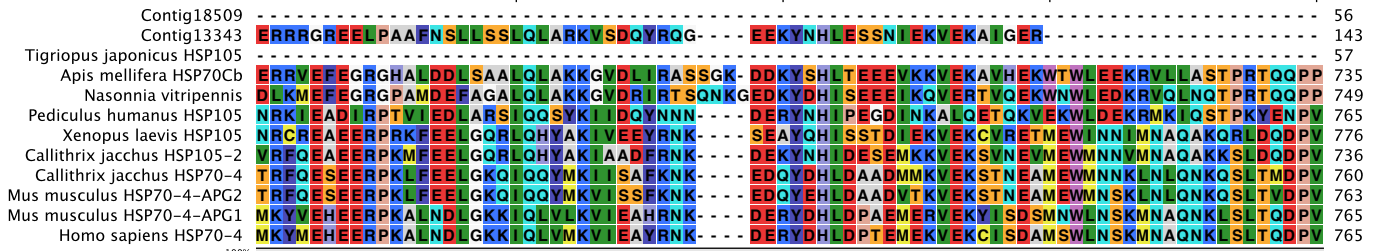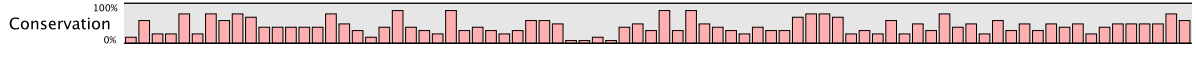

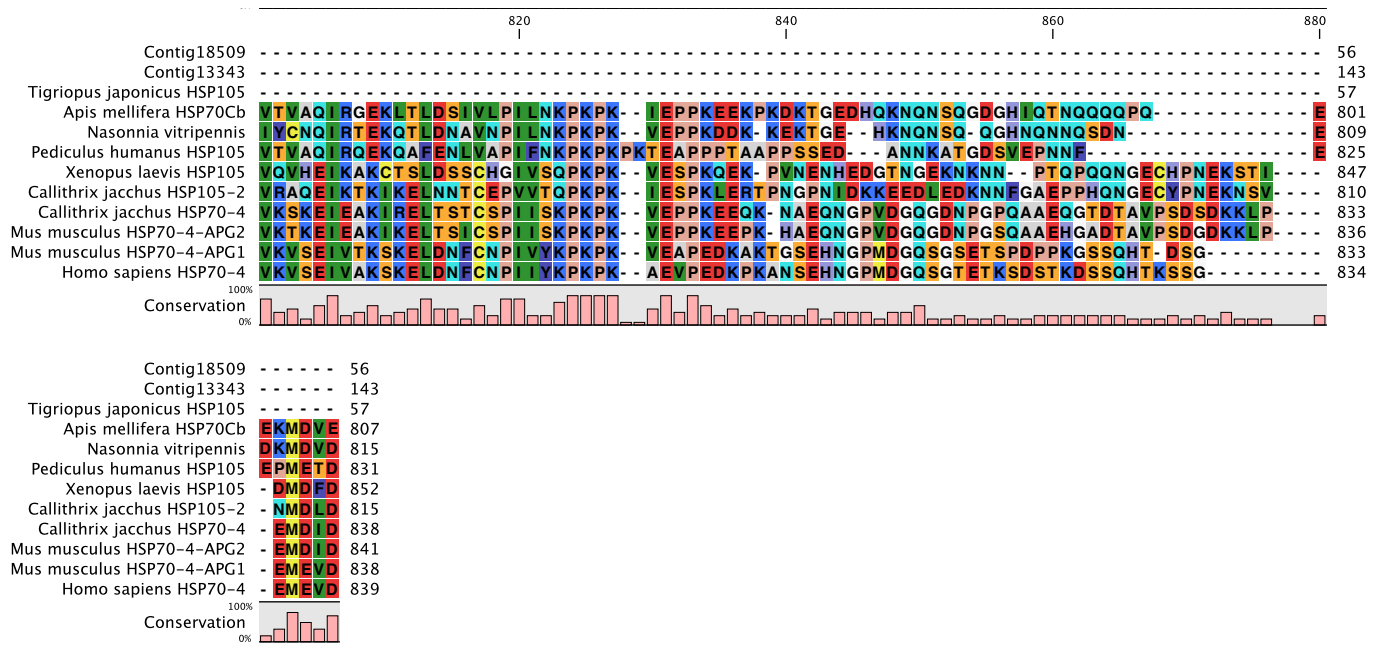

Supplement: pone.0015919.s006.pdf [file pone.0015919.s006.pdf]
